# Supplementary material
Source: publisher figshare collection journal article supplement (https://gsajournals.figshare.com/ndownloader/files/22344783)
Supplement: Supplementary file 1 [file 22344783]

## Sheet: FEV1_suggestive_association
CHROM	BEGIN	END	MARKER_ID	NS	AC	CALLRATE	MAF	PVALUE	BETA	SEBETA	TSTAT	R2
chr2	99730761	99730761	chr2:99730761_A/C	867	1398	1	0.19377	2.2387e-07	0.30706	0.058822	5.2203	0.030542
chr10	48526936	48526937	chr10:48526936_TG/T	867	8	1	0.0046136	2.8487e-07	-1.7957	0.34706	-5.174	0.03002
chr10	48545764	48545764	chr10:48545764_A/G	867	8	1	0.0046136	2.8487e-07	-1.7957	0.34706	-5.174	0.03002
chr12	88765947	88765947	chr12:88765947_C/T	867	71	1	0.040946	3.0563e-07	0.62458	0.12103	5.1605	0.029867
chr12	88783270	88783270	chr12:88783270_G/A	867	49	1	0.028258	4.4195e-08	0.79197	0.14341	5.5226	0.034058
chr12	88793808	88793808	chr12:88793808_C/A	867	49	1	0.028258	4.4195e-08	0.79197	0.14341	5.5226	0.034058
chr12	88796826	88796826	chr12:88796826_T/C	867	49	1	0.028258	4.4195e-08	0.79197	0.14341	5.5226	0.034058
chr12	88797371	88797371	chr12:88797371_C/T	867	49	1	0.028258	4.4195e-08	0.79197	0.14341	5.5226	0.034058
chr12	88798068	88798068	chr12:88798068_C/G	867	49	1	0.028258	4.4195e-08	0.79197	0.14341	5.5226	0.034058
chr12	88801600	88801600	chr12:88801600_A/G	867	49	1	0.028258	4.4195e-08	0.79197	0.14341	5.5226	0.034058
chr12	88802121	88802121	chr12:88802121_T/C	867	47	1	0.027105	1.5457e-07	0.77482	0.14645	5.2906	0.031345
chr12	88803531	88803531	chr12:88803531_T/G	867	47	1	0.027105	1.5457e-07	0.77482	0.14645	5.2906	0.031345
chr12	88810932	88810933	chr12:88810932_CA/C	867	47	1	0.027105	1.5457e-07	0.77482	0.14645	5.2906	0.031345
chr12	88813735	88813735	chr12:88813735_C/T	867	47	1	0.027105	1.5457e-07	0.77482	0.14645	5.2906	0.031345
chr12	88817859	88817859	chr12:88817859_T/G	867	47	1	0.027105	1.5457e-07	0.77482	0.14645	5.2906	0.031345
chr12	88826878	88826878	chr12:88826878_A/C	867	50	1	0.028835	4.0887e-08	0.78643	0.14204	5.5367	0.034226
chr12	88829116	88829116	chr12:88829116_C/T	867	51	1	0.029412	4.0128e-08	0.77962	0.14072	5.5401	0.034267
chr12	88839615	88839615	chr12:88839615_G/A	867	56	1	0.032295	3.9882e-07	0.68998	0.13505	5.1089	0.029291
chr12	88846435	88846435	chr12:88846435_G/A	867	53	1	0.030565	9.0104e-09	0.80103	0.13798	5.8054	0.037502
chr12	88863271	88863275	chr12:88863271_CTGTT/C	867	54	1	0.031142	4.6175e-08	0.75567	0.13703	5.5146	0.033963
chr17	49569567	49569567	chr17:49569567_G/A	867	7	1	0.0040369	2.114e-07	1.9391	0.37069	5.2312	0.030666

## Sheet: readme
File is in EPACT format
MARKER_ID	chr:pos_REF/ALT
Statistics reported relative to ALT allele
